# Supplementary material for: Influence of continuous renal replacement therapy on the plasma concentration of tigecycline in patients with septic shock: A prospective observational study
Source: PubMed Central journal article supplement (PMC10034132; doi:10.3389/fphar.2023.1118788), 2023-03-09
Supplement: Table1.pdf [file Table1.pdf]

## Supplemental data

Table S1. BIF of variables (variable selection for serum concentration)

| Variables | C <sub>min</sub> | C <sub>max</sub> |
|-----------|------------------|------------------|
| CRRT      | 99.5%*           | 32.5%            |
| ALT       | 50.1%*           | 29.7%            |
| AST       | 35.4%            | 26.3%            |
| TB        | 20.2%            | 16.6%            |
| ALB       | 21.1%            | 31.7%            |

\*Selected in final multivariate models. Variables were selected by bootstrapped stepwise regression method.

BIF: bootstrap inclusion frequency.
